# Investigating Ethical Tradeoffs in Crisis Standards of Care through Simulation of Ventilator Allocation Protocols

Jonathan Herington<sup>1,2\*</sup>, Jessica Shand<sup>1,3</sup>, Jeanne Holden-Wiltse<sup>4</sup>, Anthony Corbett<sup>4</sup>,  
Richard Dees<sup>2</sup>, Chin-Lin Ching<sup>5</sup>, Margie Shaw<sup>1</sup>, Xueya Cai<sup>6</sup>, Martin Zand<sup>4,7</sup>.

<sup>1</sup> Department of Health Humanities and Bioethics, University of Rochester, Rochester, NY, USA

<sup>2</sup> Department of Philosophy, University of Rochester, Rochester, NY, USA

<sup>3</sup> Department of Pediatrics, University of Rochester, Rochester, NY, USA

<sup>4</sup> Clinical and Translational Sciences Institute, University of Rochester, Rochester, NY, USA

<sup>5</sup> Department of Medicine, University of Rochester, Rochester, NY, USA

<sup>6</sup> Department of Biostatistics, University of Rochester, Rochester, NY, USA

<sup>7</sup> Division of Nephrology, Department of Medicine, University of Rochester, Rochester, NY, USA

\* Corresponding author

Email: [jonathan.herington@rochester.edu](mailto:jonathan.herington@rochester.edu) (JH)

# 1 Investigating Ethical Tradeoffs in Crisis Standards 2 of Care through Simulation of Ventilator Allocation 3 Protocols

## 4 **Abstract**

5 **Introduction:** Arguments over the appropriate Crisis Standards of Care (CSC) for public health  
6 emergencies often assume that there is a tradeoff between saving the most lives, saving the most life-  
7 years, and preventing racial disparities. However, these assumptions have rarely been explored  
8 empirically. To quantitatively characterize possible ethical tradeoffs, we aimed to simulate the  
9 implementation of five proposed CSC protocols for rationing ventilators in the context of the COVID-19  
10 pandemic.

11 **Methods:** A Monte Carlo simulation was used to estimate the number of lives saved and life-years saved  
12 by implementing clinical acuity-, comorbidity- and age-based CSC protocols under different shortage  
13 conditions. This model was populated with patient data from 3707 adult admissions requiring ventilator  
14 support in a New York hospital system between April 2020 and May 2021. To estimate lives and life-  
15 years saved by each protocol, we determined survival to discharge and estimated remaining life  
16 expectancy for each admission.

17 **Results:** The simulation demonstrated stronger performance for age- and comorbidity-sensitive  
18 protocols. For a capacity of 1 bed per 2 patients, ranking by age bands saves approximately 28.7 lives  
19 and 3408 life-years per thousand patients, while ranking by Sequential Organ Failure Assessment  
20 (SOFA) bands saved the fewest lives (13.2) and life-years (416). For all protocols, we observed a positive  
21 correlation between lives saved and life-years saved. For all protocols except lottery and the banded  
22 SOFA, significant disparities in lives saved and life-years saved were noted between White non-Hispanic,  
23 Black non-Hispanic, and Hispanic sub-populations.

24 **Conclusion:** While there is significant variance in the number of lives saved and life-years saved, we did  
25 not find a tradeoff between saving the most lives and saving the most life-years. Moreover, concerns  
26 about racial discrimination in triage protocols require thinking carefully about the tradeoff between  
27 enforcing equality of survival rates and maximizing the lives saved in each sub-population.

## 28 **1.0 Introduction**

29 The allocation of scarce resources during public health emergencies is often presumed to require  
30 balancing several high-level ethical goals. For scarce resource allocation, potential ethical goals may  
31 include (i) saving the most lives,(1) (ii) saving the most life-years,(2,3) (iii) respecting principles of non-  
32 discrimination,(4) or (iv) promoting health equity.(5) Crisis Standard of Care (CSC) protocols, which  
33 allocate scarce hospital resources in the setting of public health emergencies, are one such area of  
34 policymaking. Published and widely recognized protocols, such as the New York State (NYS) Ventilator  
35 Allocation Guidelines, the Pennsylvania Crisis Standards of Care, and the Colorado Crisis Standards of  
36 Care Plan (1,3,6) are taken to encode judgements about how to weight competing ethical values. The  
37 NYS guidelines use the Sequential Organ Failure Assessment (SOFA) with the stated goal of maximizing  
38 survival to discharge,(1) while the Colorado guidelines use SOFA plus quantitative adjustments for  
39 comorbidities to maximize life-years saved.(6) These protocols make an implicit assumption that the  
40 chosen clinical criteria will promote the intended ethical goal. Moreover, they assume that tradeoffs exist  
41 between goals--for example between saving the most lives and ameliorating health inequities. Because  
42 these policies are implemented in complex, dynamic systems, these assumptions may turn out to be  
43 false. Modelling of COVID-19 vaccine allocation strategies, for example, suggested no tradeoff between  
44 vaccination strategies that saved the most lives and life-years because of the strong association between  
45 age and COVID-19 mortality.(7) Rigorous and reproducible methodologies to test ethical assumptions is  
46 therefore essential if CSC protocols are to serve their intended ethical goals.

47 Recent work (8–10) has attempted to simulate the implementation of CSC protocols in the setting  
48 of COVID-related scarcity. Miller et. al.(9) and Wunsch et. al.(10) assessed the predictive value and  
49 potential racial bias of popular protocols, but used a convenience data set of non-COVID positive  
50 individuals without simulating demand or resource scarcity. Bhavani et. al.(8) used simulation methods to

51 investigate allocation protocols in the setting of scarcity, but simulated triage only for COVID+ patients  
52 and did not estimate post-discharge life expectancy. Finally, Kim et. al.(11) used a discrete event  
53 simulation approach, with accompanying demand models for COVID-19 patients, to train a bespoke  
54 machine learning model for prioritizing critical care beds, but they did not assess the performance of  
55 proposed triage protocols. None of the previously reported simulation methods attempted to evaluate the  
56 tradeoff between saving the most lives to discharge and saving the most life-years.

57 We expand on this work to develop a simulation of CSC protocols that estimates tradeoffs  
58 between lives saved, life-years saved, and equal allocation of resources amongst racial groups. We  
59 ground our analysis in a more realistic context than prior work by evaluating previously published and  
60 adopted CSC protocols in the setting of a mixed population of COVID+ and COVID- patients. Our hope is  
61 that our application of quantitative simulation to a real-world clinical dataset can be broadly adapted to  
62 other bioethical debates about the appropriate mechanism for resource allocation in health systems.

## 63 **2.0 Methods**

64 We sought to simulate the implementation of five proposed ventilator allocation protocols: 1) lottery; 2)  
65 age-banding; 3) pure SOFA 4) SOFA bands (New York), 5) SOFA plus comorbidity (Colorado), and 6) a  
66 different SOFA plus comorbidity model, with age as a tie breaker (Bhavani). The age-banding protocol  
67 assigns priority by 10-year age bands, with ties broken by lottery. The NY SOFA protocol assigns priority  
68 tiers by SOFA score (SOFA  $\leq 7$  = Tier 1; SOFA 8-11 = Tier 2; SOFA  $\geq 12$  = Tier 3), with ties broken  
69 through a lottery. The Colorado protocol assigns points by SOFA band ( $\leq 5$  SOFA = 1 pt; 6-9 SOFA = 2  
70 pts; 10-12 SOFA = 3 pts,  $>12$  SOFA = 4 pts), and by a modified Charlson comorbidity index, with ties  
71 broken by lottery.(6) The Bhavani protocol (8) assigns points by SOFA bands ( $<9$  SOFA = 1 pt; 9-11  
72 SOFA = 2 pts; 12-14 SOFA = 3 pts;  $>14$  SOFA = 4 pts) and adds +3 points to the SOFA score of any  
73 patient with a “severe” comorbidity, understood as a van Walraven acute Elixhauser score  $>4$  (i.e. the  
74 upper tertile of Elixhauser scores with a “90% predicted 1 year mortality” in (12)). Ties between patients in  
75 the Bhavani protocol are then broken by course-grained age-bands (0-49, 50-69, 70-84,  $\geq 85$ ) and then by  
76 lottery. To simplify this study, we ignored protocol instructions that involved re-assessment and re-  
77 assignment of ventilators.

78 Our study population included all critically-ill adult patients who received mechanical ventilation  
79 between April 2020 and May 2021 within the University of Rochester Medical Center system (including  
80 three hospitals in the Rochester metropolitan area). The URMIC Coronavirus Ethics Response Group  
81 (CERG) convened in March 2020 to adapt the 2015 NYS Ventilator Allocation Guidelines into a usable  
82 triage algorithm.(13) Using the Clinical Translational Science Institute BLIS database and in collaboration  
83 with hospital IT, the group created a robust data workflow that allowed for the extraction and database  
84 capture of clinical information from the electronic medical record system at 30 minute intervals on all  
85 inpatient that could then be used as the basis for allocation decisions. For each patient, the data included  
86 their ventilator status, their sequential organ failure (SOFA) score, and their admission date. Through a  
87 data broker, we received deidentified data from the database combined with additional data for COVID  
88 infection status, age, sex, self-identified race and ethnicity, acute comorbidities (ICD-10 diagnosis), and  
89 discharge status from electronic health records for all subjects. Missing values relevant to SOFA score  
90 calculation within the first 24 hours of ventilation were assumed to be normal (rather than imputed),  
91 aligning with common practice and the necessity for timely data in a resource shortage.(10,14)

92 Our study involved secondary re-use of a de-identified version of this dataset. It was deemed by  
93 the University of Rochester Research Subject Review Board as exempt from review and a waiver of  
94 informed consent was granted. The dataset was fully anonymized before being accessed by the study  
95 team, and was provided to us on the 15<sup>th</sup> of January 2022.

96 4604 admissions involving mechanical ventilation, from 4147 unique patients, were identified  
97 during the study period. Of these, 897 (19.5%) were excluded because they (i) lacked the lab results  
98 required to calculate an initial SOFA score within  $\pm 24$  hours of their initial intubation (n=320), (ii) had no  
99 discharge disposition, ICD-10 codes or COVID test data (n=245), or (iii) had an unclear pattern of  
100 admissions and intubations (n=332). The distribution of age, sex, race and COVID positivity amongst the  
101 excluded patients was similar to the included patients. There was no significant difference in survival  
102 rates amongst the excluded (72%) and included (72%) encounters (Table S5). Demographic features of  
103 the final modelling cohort of 3707 encounters from 3512 unique patients are described in Table 1.

**Table 1: Descriptive Statistics for Mechanically Ventilated Adult Patients, March 2020 to April 2021**

| Feature               | n           | %   | Survival<br>% (CI) | Age-Adjusted Survival<br>% (CI) |
|-----------------------|-------------|-----|--------------------|---------------------------------|
| <b>Overall</b>        | <b>3707</b> |     | <b>72 (71-74)</b>  | <b>84 (82-86)</b>               |
| <b>Sex</b>            |             |     |                    |                                 |
| Male                  | 2197        | 59  | 73 (71 - 75)       | 84 (80 - 87)                    |
| Female                | 1510        | 41  | 72 (69 - 74)       | 84 (80 - 86)                    |
| <b>Age</b>            |             |     |                    |                                 |
| <25                   | 104         | 03  | 93 (86 - 97)       |                                 |
| 25-34                 | 235         | 06  | 90 (85 - 93)       |                                 |
| 35-44                 | 247         | 07  | 83 (77 - 87)       |                                 |
| 45-54                 | 456         | 12  | 81 (77 - 85)       |                                 |
| 55-64                 | 868         | 23  | 76 (73 - 79)       |                                 |
| 65-74                 | 980         | 26  | 69 (66 - 73)       |                                 |
| 75-84                 | 629         | 17  | 60 (54 - 64)       |                                 |
| >85                   | 188         | 05  | 50 (38 - 59)       |                                 |
| <b>Race</b>           |             |     |                    |                                 |
| AAPI, non-Hispanic    | 50          | 01  | 78 (61 - 89)       | 87 (24 - 97)                    |
| AIAN, non-Hispanic    | 3           | >01 | 1.0                | 1.0                             |
| Black, non-Hispanic   | 577         | 16  | 76 (72 - 80)       | 82 (74 - 87)                    |
| Hispanic              | 152         | 04  | 82 (73 - 88)       | 89 (78 - 94)                    |
| White, non-Hispanic   | 2752        | 74  | 71 (69 - 74)       | 85 (81 - 87)                    |
| >1 Race, non-Hispanic | 16          | >01 | 75 (36 - 93)       | 87 (23 - 96)                    |
| Unknown, non-Hispanic | 157         | 04  |                    | 79 (81 - 87)                    |
| <b>COVID Status</b>   |             |     |                    |                                 |
| Negative              | 2431        | 66  | 73 (71 - 75)       | 84 (81 - 86)                    |
| Positive              | 1276        | 34  | 71 (68 - 74)       | 83 (76 - 88)                    |
| <b>SOFA Band</b>      |             |     |                    |                                 |
| 1-7                   | 3192        | 86  | 76 (74 - 77)       | 87 (84 - 89)                    |
| 8-11                  | 372         | 10  | 56 (49 - 63)       | 58 (15 - 80)                    |
| 11-24                 | 143         | 04  | 48 (34 - 59)       | 75 (00 - 83)                    |

104

105           We simulated the implementation of each protocol under different levels of scarcity using a Monte

106 Carlo method. Extending the approach of Bhavani et al.,(8) our model simulates an  $n/20$  (i.e. 5%,

107 10%...95% capacity) ventilator shortage by (1) randomly sampling twenty patients  $\langle A, B, \dots, T \rangle$  from our

108 dataset, and assigning each patient to one of ten decision “pairs” randomly numbered 1 through 10 (e.g.

109 1:[A, R], 2:[H, C]...10: [Q, L]) , (2) ranking the patients in each pair for priority based on the relevant

110 protocol (e.g. 1:[A > R], 2:[C > H]...10:[Q>L]), (3) allocating beds to both patients in the first  $n-10$  pairs

111 (i.e. if  $n=15$ , then assign [A=1, R=1], [C=1, H=1] etc. to first five pairs), and not allocating beds to either

112 patient in the last  $10-n$  pairs (i.e. if  $n=15$ , then no pairs miss out on beds), 4) allocating a bed to the

113 highest priority patients in each remaining pair (e.g. [Q=1, L=0]), and 4) repeating this process until all

114 patients in our dataset have been allocated (or not) a bed. We estimated survival in each simulation by

115 observing the actual (scarcity-free) survival to discharge of patients assigned beds. We assumed that  
116 patients who were not allocated a bed in our simulation did not survive. We repeated the simulation 1,000  
117 times for the 50% capacity results and 250 times for all other capacity levels.

118 For each simulation, we calculated (i) survival rate, (ii) age-adjusted survival rate, and (iii)  
119 aggregate comorbidity-adjusted life expectancy (in years). Due to COVID's severe age-associated  
120 mortality and the distribution of age within racial groups, survival rates for sub-populations were age-  
121 adjusted, and confidence intervals for both raw and age-adjusted rates were calculated using the  
122 modified Gamma method of Tiwari et al.(15,16) Raw life expectancy was calculated for each subject from  
123 the corresponding National Vital Statistics System (NVSS) life tables for their age, sex and race. The  
124 impact of comorbidities on life expectancy was estimated by applying the adjustments previously  
125 calculated by Cho et. al for Medicare recipients without a history of cancer.(17) Subjects were placed into  
126 one of three comorbidity bands (none, low/medium, high) and the corresponding age adjustment in Cho  
127 et. al was applied, before re-calculating the subject's life expectancy using the NVSS tables. The  
128 comorbidity adjustment for a 65yr old in Cho et. al was applied to all subjects in our cohort <65yrs (we  
129 explore the limitations of this approach in the discussion).

130 We then defined "lives saved" and "years of life saved" per patient for each protocol,  $p$ , and beds-  
131 per-patient capacity level, ( $0 < c < 1$ ), by first identifying the survival rate,  $S_B$ , and expected years of life  
132 lived post-discharge per patient,  $LY_B$ , of our population in the baseline no scarcity scenario. Next, for each  
133 capacity level, we defined the expected survival rate ( $S_B \times c$ ) and expected years of life per patient ( $LY_B$   
134  $\times c$ ) as the product of the baseline rates and the relevant capacity constraint (e.g. 0.5 beds er patient).  
135 Lives saved per patient,  $LS_{p,c}$ , is the difference between the simulated survival rate for the protocol and  
136 the expected survival rate for that capacity. Years of life saved per patient,  $LYS_{p,c}$ , is the difference  
137 between the simulated number of life-years lived per patient for that protocol, and the expected number of  
138 life-years lived for that capacity.

139 All data analysis was performed in Python v3.11 using the pandas, matplotlib, numpy, scipy,  
140 seaborn and statsmodels packages. De-identified data is available at

141 <https://figshare.com/s/fb7e6ac1702b5e9a95fd> . Simulation and analysis code is available at  
142 <https://github.com/jcherington/triage-sim>.

### 143 **3. Results**

144 Our population of 3707 ventilator encounters with 3512 unique subjects had a mean ( $\pm$  std) age of 62  
145 ( $\pm 16$ ) (Table 1). Among them, Black and Hispanic patients were younger ( $56 \pm 17$  and  $53 \pm 18$ ) compared to  
146 non-Hispanic White patients ( $64 \pm 15$ ). Black patients were more likely (rate [95% CI]) to be diagnosed with  
147 COVID (.45 [.41-.49]), compared to Hispanic (.39, [.32-.47]) and non-Hispanic White patients (.33, [.31-  
148 .34]). In addition, SOFA scores at the initial point of intubation were higher for White subjects (mean  $\pm$  std:  
149  $3.69 \pm 0.07$ ) than for both Black and Hispanic subjects ( $3.46 \pm 0.15$  and  $3.14 \pm 0.29$ ).

150 Contrary to prior reported results(5,8,10) in our baseline population, we did not observe significant racial  
151 disparities in age-adjusted survival amongst White, Black and Hispanic patients who received mechanical  
152 ventilation (Table 2). Neither did we observe significant disparities in age-adjusted survival (rate [95% CI])  
153 for patients who were COVID positive (.84 [.81-.87]) and negative (.83 [.76-.88]). In a multiple variable  
154 logistic regression model, SOFA score at the point of initial intubation (OR: .896, [.878-.916]), age in  
155 years (OR: .964, [.958-.969]), and Elixhauser score (OR: 1.054, [1.033-1.074]) were all predictive of  
156 survival, whereas sex, race and COVID-positivity were not significantly predictive (**Table S7**).

#### 157 **3.1 Allocation Inequalities**

158 When simulating a shortage of ventilators where only one bed is available for two patients ( $c=0.5$ ), and  
159 without controlling for other factors (i.e. clinical acuity), all protocols except Lottery exhibited significant  
160 racial disparities in allocation of ventilators (Table 2). Contrary to prior findings with simulated populations  
161 of COVID positive patients,(8) in our simulations with mixed populations of COVID positive and negative  
162 patients, allocation of ventilators favored non-Hispanic Black and Hispanic patients when compared to  
163 non-Hispanic Whites (Fig S9). Allocation disparities were most pronounced for the Age-based protocol  
164 and least pronounced in the context of the NY SOFA protocol.



## 165 3.2 Survival and Lives Saved

166 In a simulation of moderate scarcity (0.5 beds per patient), the Age-based protocol had significantly  
 167 higher overall survival rates (.3916 [.3914-.3918]) than any other protocol (Table 2). On the other hand,  
 168 the NY SOFA (.3760 [.3758-.3762]) protocol resulted in lower overall survival rates than all other  
 169 protocols except Lottery (.3629 [.3727-.3631]), both in overall and in age-adjusted terms for every  
 170 racial/ethnic sub-population. The Bhavani, Colorado, and Pure SOFA protocols exhibited significantly  
 171 lower rates of age-adjusted survival for White patients compared to both their Black and Hispanic  
 172 counterparts, with the biggest racial inequalities in age-adjusted survival occurring for the Colorado  
 173 protocol (White: .488, Black: .524). The Age-based and Lottery protocols exhibited significantly lower age-  
 174 adjusted survival for Black patients, compared to the White or Hispanic population. Unsurprisingly, the  
 175 Age-based protocol heavily skewed survival towards younger Age groups, while NY SOFA and Lottery  
 176 resulted in roughly similar distributions of survival across age-groups (Table S8 and Fig S10).

**Table 2: Allocation and Survival by Protocol and Race and Ethnicity.**

| Protocol                           | Overall Survival (%)          | Allocation Rate by Race and Ethnicity (%) |                            |                     | Age-Adjusted Survival Rate (%) |                            |                     |
|------------------------------------|-------------------------------|-------------------------------------------|----------------------------|---------------------|--------------------------------|----------------------------|---------------------|
|                                    |                               | Non-Hispanic, Black                       | Hispanic, All Races        | Non-Hispanic, White | Non-Hispanic, Black            | Hispanic, All Races        | Non-Hispanic, White |
| <b>Baseline</b><br>(100% capacity) | 72.57<br>(70.83-74.23)        | 100                                       | 100                        | 100                 | 82.3<br>(74.5-87.4)            | 89.1<br>(78.4-94.1)        | 85<br>(81.4-87.4)   |
| <b>Lottery</b>                     | 36.29<br>(36.27-36.31)        | 50.1<br>(50.0-50.2)                       | <b>50.3</b><br>(50.1-50.5) | 50.0<br>(49.9-50.0) | 41.1<br>(40.9-41.3)            | <b>45.0</b><br>(44.7-45.4) | 42.5<br>(42.3-42.6) |
| <b>Age</b>                         | <b>39.16</b><br>(39.14-39.18) | <b>59.7</b><br>(59.6-59.8)                | <b>64.7</b><br>(64.5-64.9) | 46.6<br>(46.6-46.7) | 68.2<br>(68.1-68.2)            | <b>73.6</b><br>(73.5-73.8) | 71.2<br>(71.1-71.2) |
| <b>Pure SOFA</b>                   | 37.96<br>(37.94-37.97)        | <b>51.8</b><br>(51.7-51.9)                | <b>55.3</b><br>(55.1-55.5) | 49.7<br>(49.7-49.7) | <b>51.2</b><br>(51.0-51.4)     | 50.4<br>(50.1-50.7)        | 48.3<br>(48.2-48.5) |
| <b>NY SOFA</b>                     | 37.60<br>(37.58-37.62)        | <b>50.5</b><br>(50.3-50.6)                | <b>51.0</b><br>(50.8-51.3) | 50.0<br>(50.0-50.1) | 44.5<br>(44.3-44.7)            | <b>47.1</b><br>(46.8-47.4) | 44.5<br>(44.3-44.7) |
| <b>Colorado</b>                    | 37.76<br>(37.74-37.77)        | <b>52.0</b><br>(51.9-52.1)                | <b>55.7</b><br>(55.5-55.9) | 49.6<br>(49.6-49.6) | <b>52.4</b><br>(52.2-52.5)     | 51.2<br>(51.0-51.5)        | 48.8<br>(48.7-48.9) |
| <b>Bhavani</b>                     | 38.08<br>(38.06-38.10)        | <b>53.3</b><br>(53.2-53.4)                | <b>58.0</b><br>(57.8-58.2) | 49.1<br>(49.1-49.2) | <b>55.2</b><br>(55.0-55.3)     | 54.8<br>(54.6-55.0)        | 52.7<br>(52.6-52.8) |

\*Mean overall survival rate and 95% CIs are reported for 1000 Monte Carlo simulations at 50% scarcity.

177 Because survival rates are heavily influenced by the distribution of survival amongst sub-populations in  
 178 our underlying cohort, we also estimate the number of lives saved by each protocol: i.e. the additional

179 number of lives saved by employing a protocol instead of using a lottery (Table 3 and Fig 1). In a  
 180 simulation of c=0.5 beds per patient, the Age-based protocol saved more than twice as many lives per  
 181 thousand patients (28.7 [28.6-28.9]) as the nearest competing protocol, Pure SOFA (16.7 [16.5-16.9]).  
 182 Again, the NY SOFA protocol (13.2 [13.0-13.4]) saved the least lives per thousand patients of any  
 183 protocol, both overall and for the Black (16.5 [15.4-17.5]) and Hispanic (9.9 [7.8-12.1]) sub-populations.  
 184 This effect was reversed for the White sub-population, for whom the NY SOFA protocol saved the most  
 185 lives (13.6, [13.3-13.9]) and the Age protocol the least (4.3 [4.0-4.6]). All protocols except NY SOFA  
 186 exhibited significantly lower numbers of lives saved for White patients compared to both their Black and  
 187 Hispanic counterparts, with the biggest racial inequalities in lives saved occurring for the Age protocol  
 188 (White: 4.3 [4.0-4.6], Black: 99.9 [99.0-100.7], Hispanic: 143.4 [141.7-145.1]).

**Table 3: Lives Saved by Protocol and Ethnicity/Race at 50% capacity**

| Protocol         | Lives Saved<br>per 1000 patients (95% CI) |                        |                        | Overall             |
|------------------|-------------------------------------------|------------------------|------------------------|---------------------|
|                  | Non-Hispanic,<br>Black                    | Hispanic,<br>All Races | Non-Hispanic,<br>White |                     |
| <b>Age</b>       | 99.9<br>(99.0-100.7)                      | 143.4<br>(141.7-145.1) | 4.3<br>(4.0-4.6)       | 28.7<br>(28.6-28.9) |
| <b>Pure SOFA</b> | 40.8<br>(40.0-41.7)                       | 46.3<br>(44.5-48.1)    | 12.5<br>(12.2-12.7)    | 16.7<br>(16.5-16.9) |
| <b>NY SOFA</b>   | 16.5<br>(15.4-17.5)                       | 9.9<br>(7.8-12.1)      | 13.6<br>(13.3-13.9)    | 13.2<br>(13.0-13.4) |
| <b>Colorado</b>  | 41.3<br>(40.4-42.2)                       | 48.3<br>(46.5-50.1)    | 9.2<br>(8.9-9.5)       | 14.7<br>(14.5-14.9) |
| <b>Bhavani</b>   | 41.3<br>(40.4-42.2)                       | 48.3<br>(46.5-50.1)    | 9.2<br>(8.9-9.5)       | 18<br>(17.8-18.2)   |

189  
 190 **Fig 1. Lives saved per patient by protocol: A.** Overall increase in lives saved per patient, for each  
 191 protocol, at 50% scarcity. **B.** Lives saved per patient stratified by racial group, for each protocol, at 50%  
 192 scarcity.

193  
 194 After simulating different capacity shortages, we noted that the magnitude of the dominance of the Age  
 195 protocol was sensitive to the degree of scarcity (Table S9 & Figure 2). At 0.5 beds per patient the Age  
 196 based protocol saves approximately 28.7 additional lives per 1000 patients (relative to the Lottery

197 protocol), while at 0.9 beds/patient, the protocol saves only 5.6 lives per 1000 patients. The differences  
 198 between NY SOFA, Colorado and the Bhavani protocols at capacities of greater than 0.85 beds per  
 199 patient are not statistically significant (Table S9 & Figure 2).

200 **Fig 2. Lives saved at different levels of scarcity, for each protocol.** The greatest differences between  
 201 protocols occur at moderate levels of scarcity (i.e. ~0.5 beds per patient), and differences between  
 202 protocols decline at both high and low levels of scarcity.

203

### 204 3.3 Life-years saved

205 With respect to life-years saved, for a scarcity level of 0.5 beds per patient, the Age-based protocol saved  
 206 more than twice as many life-years per thousand patients (3408 [3402-3413]) than the nearest competing  
 207 protocol, Bhavani (1454 [1447-1461]) (Table 4 and Fig 3). The NY SOFA protocol saved fewer life-years  
 208 than all other protocols, both overall (416 [407-424]) and for every racial/ethnic sub-population (White:  
 209 377 [366-388], Hispanic: 450 [366-534], Black: 626 [591-661]). All five non-random protocols resulted in  
 210 significantly fewer life-years saved for White patients when compared to both their Black and Hispanic  
 211 counterparts (Table 4 and Fig 3). After simulating different capacity shortages, we again noted that the  
 212 difference between Age and other protocols was sensitive to the degree of scarcity, but less so than lives  
 213 saved (Table S9). For instance, at 0.9 beds/patient, the Age protocol saves only 681 [674-688] life-years  
 214 per thousand patients, but continue to outperform its nearest competing protocol, Pure SOFA (299 [290-  
 215 308]), by a factor of two (Table S9).

**Table 4: Life-years Saved by Protocol and Ethnicity/Race at 50% capacity**

| Protocol         | Life-years Saved<br>per 1000 patients (95% CI) |                        |                        | Overall             |
|------------------|------------------------------------------------|------------------------|------------------------|---------------------|
|                  | Non-Hispanic,<br>Black                         | Hispanic,<br>All Races | Non-Hispanic,<br>White |                     |
| <b>Age</b>       | 5517<br>(5494-5540)                            | 8531<br>(8478-8584)    | 2553<br>(2545-2561)    | 3408<br>(3402-3413) |
| <b>Pure SOFA</b> | 1957<br>(1928-1985)                            | 2245<br>(2172-2317)    | 584<br>(574-592)       | 839<br>(831-846)    |
| <b>NY SOFA</b>   | 626<br>(591-661)                               | 450<br>(366-534)       | 377<br>(366-388)       | 416<br>(407-424)    |

|                 |                     |                     |                     |                     |
|-----------------|---------------------|---------------------|---------------------|---------------------|
| <b>Colorado</b> | 2226<br>(2198-2253) | 2596<br>(2529-2662) | 698<br>(689-708)    | 999<br>(992-1007)   |
| <b>Bhavani</b>  | 2916<br>(2890-2942) | 3748<br>(3688-3808) | 1048<br>(1040-1057) | 1454<br>(1447-1461) |

216

217 **Fig 3: Life years saved per patient.** A. Overall increase in life years saved per patient, for each protocol,  
 218 at 50% scarcity. B. Life years saved per patient stratified by racial group, for each protocol, at 50%  
 219 scarcity.

220

## 221 4.0 Discussion

222 In this simulation study, we found that Age-based protocols significantly outperformed all other protocols  
 223 with respect to both lives saved and life-years saved. At moderate levels of scarcity (i.e. 0.5 beds per  
 224 patient), we estimate that selecting Age over Lottery could save approximately 29 lives per thousand  
 225 patients requiring ventilation. When scaled to a national level, this level of effectiveness compares very  
 226 favorably to classic public health interventions such as seatbelt use (14,955 lives saved per year)(18) or  
 227 flu vaccination (7,200 lives saved from 36 million infections in 2020, or 0.2 lives saved per 1000  
 228 infections).(19) Because age-based protocols discriminate on the basis of age, they have an uncertain  
 229 legal status.. Among the other four protocols, the difference between the best (Bhavani) and worst  
 230 performing (NY SOFA) protocols is less pronounced but still significant, saving approximately 5 lives and  
 231 1040 life-years per thousand patients at moderate levels of scarcity.

232 Notably, the level of scarcity appears to have a dramatic influence on the effect size of choosing different  
 233 protocols. While the Age based protocol dominates the other protocols for both severe (0 – 0.2 beds per  
 234 patient), moderate (0.4-0.6 beds per patient) and low levels of scarcity, the size of the effect diminishes  
 235 substantially at low and severe scarcity. At very low levels of scarcity (e.g. 0.9 beds per patient), choosing  
 236 Age over NY SOFA still saves 2.9 lives per 1000 patients. The differences between NY SOFA, Pure  
 237 SOFA, Colorado and Bhavani at that level of scarcity are not statistically significant, suggesting that other  
 238 ethical considerations such as complexity of implementation, transparency, and social acceptability may  
 239 be decisive.

240 One possible explanation for the poor performance of the NY SOFA protocol is that it has many fewer  
241 prioritization bands (i.e. only 3) than the other protocols (Age = 8 bands, Colorado = 10 bands, Pure  
242 SOFA = 23 bands, Bhavani = 28 bands). In principle, more bands add greater discriminatory power to a  
243 protocol and so enhance its ability to save lives at the margins. This is borne out by the significant but  
244 small improvement offered by the Pure SOFA protocol. This empirical result suggests that the value of  
245 treating clinically similar cases alike (by having relatively “wide” priority bands) must be weighed against  
246 the value of maximizing the overall numbers of lives saved.

## 247 **4.1 Tradeoffs Between Lives and Life-Years**

248 Much prior work has assumed that there is an empirical tradeoff between lives saved and numbers of life-  
249 years saved, thus necessitating a difficult normative decision about prioritizing different values in the  
250 context of disagreement.(2) In our simulations, that tradeoff is not evident. Not only does the Age-based  
251 protocol save the most lives, it also saves the most life-years. Indeed, this result appears to be robust for  
252 all protocols. While there is a high degree of variance in both survival and longevity within each protocol,  
253 protocols which save more lives on average also save more life-years on average.

254 This result call into question the assumed tension between maximizing survival to discharge and  
255 maximizing life-years saved, but it also illuminates the different justifications one might have for focusing  
256 on the distinction between lives and life-years. For utilitarians, who aim simply to maximize the aggregate  
257 good, this result suggests that the distinction between lives and life-years is empirically unimportant when  
258 choosing a pandemic policy. For those who hold a “fair innings” view for the importance of allocating  
259 ventilators to younger patients, this result is less important – since saving people with long life  
260 expectancies is an ancillary result of prioritizing patients who have yet to progress through the different  
261 stages of life. Alongside the performance of the Age protocol, this result shows that prioritizing the young  
262 is at least compatible with maximizing the number of lives saved.

263 **Fig 4: Tradeoffs between life years saved and lives saved.** While there is significant variance in  
264 numbers of lives and life years saved, there is a strong positive correlation between each statistic for all  
265 protocols.

266

## 267 **4.2 Tradeoffs between Performance and Racial Disparities**

268 Of those protocols examined, the protocol that offered the most equal distribution of survival rates over  
269 the three racial groups had the least favorable overall performance (excluding a simple Lottery). In our  
270 simulations, at all levels of scarcity and for all protocols except the NY SOFA and Lottery, the White sub-  
271 population experienced significantly lower allocation rates, lives saved, and life-years saved. This finding  
272 is in *prima facie* tension with previously reported simulations of triage protocols with COVID-19 positive  
273 cohorts,(8) pre-pandemic cohorts,(9,10) and with the lived experience of actual COVID mortality in  
274 intensive care units.(5,20) Age-adjusted rates of survival remained significantly lower for White patients,  
275 and thus it is unlikely that the observed racial disparities are solely explained by the different age  
276 distributions amongst White non-Hispanic, Hispanic and Black non-Hispanic patients in our sample.  
277 Rather, we suspect that hospital-level population bias may explain this difference. In particular, there are  
278 two major hospital systems that offer adult critical care services in our student cohort's metropolitan area,  
279 and we cannot assume that the distribution of patients between these systems is the same for each sub-  
280 population. Hospitals serve particular patient populations, not national averages. This highlights that  
281 implementation of protocols may result in different aggregate outcomes in different contexts (i.e. with  
282 national-level results coming apart from regional or hospital level outcomes).

283 More interestingly, our results suggest a tradeoff between equalizing lives saved across racial groups,  
284 and maximizing the number of lives saved for each racial group. In our results, protocols other than NY  
285 SOFA greatly improve the number of lives saved for Black and Hispanic populations while making only  
286 marginal differences to the number of lives saved for the White population. Thus, while NY SOFA secures  
287 equality in survival rates, it would deprive Black and Hispanic populations of very large gains for little  
288 benefit in lives or life-years saved for White patients. Choosing NY SOFA in such cases would thus be a  
289 classic case of 'levelling down' – a situation where inequality makes little difference to the absolute  
290 welfare of the worst off group, but could markedly improve the welfare of other groups.(21) Notably, this  
291 tradeoff is only observable by simulating the set of alternative policies in a single population, and hence  
292 discussion of the value of equality in survival rates benefits from the use of simulation methods.

## 293 **4.3 Limitations**

294 This study has a number of important limitations. The first is that our dataset is limited to a single hospital  
295 system in a region with two major healthcare institutions. As we note above, this may partially explain our  
296 surprising findings regarding racial disparities in age-adjusted survival, because Black and Hispanic  
297 patients with poorer social determinants of health may have been more likely to have been admitted  
298 elsewhere. In future research, we hope to extract a region-wide dataset that eliminates hospital-level  
299 effects.

300 Another limitation is that we did not collect, nor adjust for, the existence of a “do-not-resuscitate” order or  
301 a decision to undertake compassionate withdrawal. In principle, some patients subject to DNRs may have  
302 otherwise survived their admission and, given well characterized racial differences in the uptake of DNR  
303 orders, this may have artificially depressed survival rates for White patients relative to other racial sub-  
304 populations.(22) While this is true for survival rates, it is less likely to distort differences in the lives saved  
305 and life-years saved statistics since it accounts for variation in actual mortality (including withdrawal of  
306 treatment and natural expiration) and estimates deviations from “expected” survival rates for each  
307 population.

308 A final limitation of our simulation is that it does not allow for “re-allocation” of ventilators. Most existing  
309 protocols (including New York’s, Maryland’s and Colorado’s) allow patients a “timed trial” of ventilation,  
310 and contemplate mechanisms for removing ventilators from patients who are not improving at specified  
311 re-assessment timepoints.(23) The criteria for re-allocation (and the timing of re-assessments) must  
312 therefore strike a balance between giving each individual a chance to recover and preventing “wastage”  
313 of ventilators on patients who will not recover.(24) In this respect, the criteria for reallocation may have  
314 significant effects on the survival of individual patients and the overall numbers of lives saved.

315 Unfortunately, our existing dataset and simulation strategy cannot accommodate reallocation of  
316 ventilators, since it only includes SOFA scores collected at point of intubation, and thus envisages  
317 allocation until survival or natural expiration. Future work should incorporate time-series datasets of  
318 patient trajectories while intubated, and simulation designs that allow for “pools” of ventilators to be  
319 allocated and re-allocated. We leave this extension for future work.

## 320 **5.0 Conclusion**

321 In this paper we have empirically tested a number of assumptions that have been at the forefront of  
322 bioethical debates over the appropriate CSC protocols. In our simulation using actual patient data, we  
323 show several findings. First, there are clear performance differences between protocols, and age- or  
324 comorbidity-sensitive protocols appear to save more lives to discharge than protocols which rely on SOFA  
325 as an indicator of clinical acuity. Second, using comorbidity-adjusted estimates of post-discharge life  
326 expectancy, we show that there is unlikely to be a tradeoff between saving lives and saving life-years in  
327 the aggregate. Third, we identify that while there was tradeoff between equalizing lives saved between  
328 sub-populations and overall performance, those protocols with high levels of inequality were sometimes  
329 better for the least racial groups than protocols with more equal distributions of lives saved. These three  
330 findings cut to the heart of important bioethical debates, and should inform both philosophical and  
331 implementation work to improve CSC policy.

332 Moreover, we have reproduced and extended a methodology for prospectively and retrospectively  
333 analyzing the performance of different CSC protocols, under different levels of scarcity. Building on earlier  
334 work by Bhavani et al, we show not only that these simulation methods can be used to estimate survival,  
335 but also that they can also provide information about estimated life expectancy, inequalities between sub-  
336 populations, and the optimal parameterization of models (i.e. numbers of bands, precise threshold for  
337 clinical acuity scores). Nonetheless, the work of empirically exploring CSC protocols is not complete. So  
338 far, no simulation protocol has been generated that includes (i) all critical care patients, (ii) is sensitive to  
339 duration of resource use, and (iii) accommodates re-allocation of resources. These components are  
340 critical to many currently-existing CSC protocols, and they may yield important empirical results that alter  
341 or contradict the results from the static allocation simulations conducted here and elsewhere.(8) Without a  
342 generalizable methodology for either post hoc or ex ante testing of the ethical assumptions underpinning  
343 re-allocation of resources, we will continue to lack evidence that future allocation policies achieve their  
344 intended ethical goals. We hope that the preliminary work we present in this paper spurs others to  
345 develop more robust, dynamic models that can inform CSC policy choices for the next public health  
346 emergency.



## 347 Acknowledgements

348 The authors would like to acknowledge the efforts of Data Science Masters' students - Derek Caramella,  
349 Ezgi Siir Kibris, Nefle Nesli Oruc, and Walter Burnett - for assisting with initial exploration of the dataset  
350 under the supervision of JH. Final data acquisition, cleaning, analysis and simulation work was conducted  
351 by JH. The authors would like to thank Michael Nabozny, William Parker, Lainie Ross and the members  
352 of the URMCAfrican American Patient and Family Advisory Council for comments on earlier versions of  
353 the project. The project described in this publication was partially supported by the University of  
354 Rochester CTSA award number UL1 TR002001 from the National Center for Advancing Translational  
355 Sciences of the National Institutes of Health. The content is solely the responsibility of the authors and  
356 does not necessarily represent the official views of the National Institutes of Health.

357

## 358 References

- 359 1. New York State Task Force on Life and the Law. Ventilator Allocation Guidelines [Internet]. New  
360 York, N.Y.: NYS Department of Health; 2015 Nov [cited 2021 Jul 4]. Available from:  
361 [https://www.health.ny.gov/regulations/task\\_force/reports\\_publications/docs/ventilator\\_guidelines.pdf](https://www.health.ny.gov/regulations/task_force/reports_publications/docs/ventilator_guidelines.pdf)
- 362 2. Emanuel EJ, Persad G, Upshur R, Thome B, Parker M, Glickman A, et al. Fair Allocation of Scarce  
363 Medical Resources in the Time of Covid-19. *New England Journal of Medicine*. 2020 Mar  
364 23;382(21):2049–55.
- 365 3. White DB, Lo B. A Framework for Rationing Ventilators and Critical Care Beds During the COVID-19  
366 Pandemic. *JAMA*. 2020 May 12;323(18):1773.
- 367 4. Silva DS. Ventilators by Lottery: The Least Unjust Form of Allocation in the Coronavirus Disease  
368 2019 Pandemic. *Chest*. 2020 Sep;158(3):890.
- 369 5. Schmidt H, Roberts D, Eneanya N. Rationing, racism and justice: advancing the debate around  
370 "colourblind" COVID-19 ventilator allocation. *Journal of medical ethics* [Internet]. 2022 Feb [cited  
371 2022 Mar 7];48(2). Available from: <https://pubmed.ncbi.nlm.nih.gov/33408091/>
- 372 6. Department of Public Health & Environment. Colorado Crisis Standards of Care [Internet]. 2022 [cited  
373 2023 Aug 1]. Available from: <https://cdphe.colorado.gov/colorado-crisis-standards-care>
- 374 7. Goldstein JR, Cassidy T, Wachter KW. Vaccinating the oldest against COVID-19 saves both the most  
375 lives and most years of life. *Proc Natl Acad Sci U S A*. 2021 Mar 16;118(11):e2026322118.
- 376 8. Bhavani SV, Luo Y, Miller WD, Sanchez-Pinto LN, Han X, Mao C, et al. Simulation of Ventilator  
377 Allocation in Critically Ill Patients with COVID-19. *Am J Respir Crit Care Med*. 2021 Nov  
378 15;204(10):1224–7.

- 379 9. Miller WD, Han X, Peek ME, Charan Ashana D, Parker WF. Accuracy of the Sequential Organ  
380 Failure Assessment Score for In-Hospital Mortality by Race and Relevance to Crisis Standards of  
381 Care. *JAMA Network Open*. 2021 Jun 18;4(6):e2113891.
- 382 10. Wunsch H, Hill AD, Bosch N, Adhikari NKJ, Rubenfeld G, Walkey A, et al. Comparison of 2 Triage  
383 Scoring Guidelines for Allocation of Mechanical Ventilators. *JAMA Network Open*. 2020 Dec  
384 14;3(12):e2029250–e2029250.
- 385 11. Kim J, Lim H, Ahn JH, Lee KH, Lee KS, Koo KC. Optimal Triage for COVID-19 Patients Under  
386 Limited Health Care Resources With a Parsimonious Machine Learning Prediction Model and  
387 Threshold Optimization Using Discrete-Event Simulation: Development Study. *JMIR Med Inform*.  
388 2021 Nov 2;9(11):e32726.
- 389 12. Snow GL, Bledsoe JR, Butler A, Wilson EL, Rea S, Majercik S, et al. Comparative evaluation of the  
390 clinical laboratory-based Intermountain risk score with the Charlson and Elixhauser comorbidity  
391 indices for mortality prediction. *PLoS One*. 2020;15(5):e0233495.
- 392 13. University of Rochester Coronavirus Ethics Response Group. Ventilator Allocation Guidelines  
393 [Internet]. Rochester, NY: University of Rochester Medical Center; 2020 May [cited 2022 Mar 9].  
394 Available from:  
395 [https://www.raom.org/resources/Documents/URMedicine%20Ventilator%20Allocation%20Guidelines](https://www.raom.org/resources/Documents/URMedicine%20Ventilator%20Allocation%20Guidelines_2020.pdf)  
396 [\\_2020.pdf](https://www.raom.org/resources/Documents/URMedicine%20Ventilator%20Allocation%20Guidelines_2020.pdf)
- 397 14. Vincent JL, de Mendonca A, Cantraine F, Moreno R, Takala J, Suter PM, et al. Use of the SOFA  
398 score to assess the incidence of organ dysfunction/failure in intensive care units: Results of a  
399 multicenter, prospective study. *Critical Care Medicine*. 1998 Nov;26(11):1793.
- 400 15. Tiwari RC, Clegg LX, Zou Z. Efficient interval estimation for age-adjusted cancer rates. *Stat Methods*  
401 *Med Res*. 2006 Dec;15(6):547–69.
- 402 16. Fay MP, Feuer EJ. Confidence intervals for directly standardized rates: a method based on the  
403 gamma distribution. *Stat Med*. 1997 Apr 15;16(7):791–801.
- 404 17. Cho H, Klabunde CN, Yabroff KR, Wang Z, Meekins A, Lansdorp-Vogelaar I, et al. Comorbidity-  
405 Adjusted Life Expectancy: A New Tool to Inform Recommendations for Optimal Screening Strategies.  
406 *Ann Intern Med*. 2013 Nov 19;159(10):667–76.
- 407 18. National Center for Statistics and Analysis. Lives saved in 2017 by restraint use and minimum-  
408 drinking-age laws. [Internet]. Washington, DC: National Highway Traffic Safety Administration; 2019  
409 Mar [cited 2024 Jan 18]. (Traffic Safety Facts Crash•Stats). Report No.: DOT HS 812 683. Available  
410 from: <https://crashstats.nhtsa.dot.gov/Api/Public/ViewPublication/812683>
- 411 19. CDC. Centers for Disease Control and Prevention. 2023 [cited 2024 Jan 18]. Benefits of Flu  
412 Vaccination During 2019-2020 Flu Season. Available from: [https://www.cdc.gov/flu/about/burden-](https://www.cdc.gov/flu/about/burden-prevented/2019-2020.htm)  
413 [prevented/2019-2020.htm](https://www.cdc.gov/flu/about/burden-prevented/2019-2020.htm)
- 414 20. Schmidt H, Roberts DE, Eneanya ND. Sequential organ failure assessment, ventilator rationing and  
415 evolving triage guidance: new evidence underlines the need to recognise and revise, unjust allocation  
416 frameworks. *J Med Ethics*. 2022 Feb;48(2):136–8.
- 417 21. Temkin L. Equality, Priority, and the Levelling-Down Objection. In: Clayton M, Williams A, editors.  
418 *The Ideal of Equality*. Macmillan; 2000. p. 126–61.
- 419 22. Shepardson LB, Gordon HS, Ibrahim SA, Harper DL, Rosenthal GE. Racial Variation in the Use of  
420 Do-Not-Resuscitate Orders. *J Gen Intern Med*. 1999 Jan;14(1):15–20.

421 23. Truog RD. Ventilator Allocation Protocols: Sophisticated Bioethics for an Unworkable Strategy.  
422 Hastings Cent Rep. 2021 Sep;51(5):56–7.

423 24. Dees RH, Herington J, Chiafery M, Shand JC, D'Angio CT, Ching CL, et al. The Ethics of  
424 Implementing Emergency Resource Allocation Protocols. The Journal of Clinical Ethics. 2023  
425 Mar;34(1):58–68.

426

## 427 **Supporting Information**

428 **Table S5: Descriptive Statistics** for INCLUDED and EXCLUDED Encounters, April 2020 to May 2021

429 **Fig S5: Violin plot of age distribution** by race and ethnicity and COVID-positivity status (AAPI, AIAN,  
430 Multi-Racial and Unknown sub-populations are not shown).

431 **Table S6: Distribution of SOFA Scores**

432 **Fig S6: Histogram of SOFA score distribution.** Coloring indicates NY SOFA scoring bad, Red = first  
433 priority, Yellow = second priority, Blue = third priority.

434 **Fig S7: Survival rates by initial SOFA score and age.** Single explanatory variable logistic regressions  
435 and 95% CI plotted. **A.** In these simple univariable logit models (Survival ~ SOFA" and "Survival ~Age"),  
436 each SOFA score point at intubation is associated with a 9.25% (7.38 – 11.09%) decrease in the  
437 probability of survival to discharge (Logit coeff. = -0.0971, std err = 0.010). **B.** In our population, each year  
438 of subject age is associated with a 3.65% (3.11 – 4.18%) decrease in the probability of survival to  
439 discharge (Logit coeff. = -0.0372, std err = 0.003).

440 **Fig S8: Initial SOFA Score and survival by race/ethnicity. A.** Distribution of SOFA score by  
441 race/ethnicity **B.** In a single explanatory variable logistic regression analyzing the relationship between  
442 SOFA score and survival for each racial/ethnic sub-population, each SOFA score point at intubation is  
443 associated with decreases in the probability of survival to discharge of 13.15% for non-Hispanic, Black  
444 patients, 3.29% (-13.2% to +8.55%) for Hispanic patients of any race, and 8.71% for non-Hispanic, White  
445 patients. Logistic regressions and 95% CI plotted.

446 **Table S7: Odds ratio of survival for whole population and racial sub-populations.** A logistic  
447 regression model was used to calculate the relationship between survival and six explanatory variables:

448 race (ref: White, non-Hispanic), sex-assigned-at-birth (ref: female), SOFA score, Age, COVID positivity  
449 (ref:neg) and Elixhauser comorbidity index. The model was also run for each racial/ethnic sub-population.  
450 Odds-ratio are reported alongside 95% confidence intervals, significant effects ( $p < 0.01$ ) in bold.

451 **Fig S9: Racial disparities in allocation.** For each protocol, the allocation rate for each race/ethnicity are  
452 shown. All rates reported are means of the underlying rates in 1000 simulations of 3700 encounters at  
453 50% scarcity.

454 **Fig S10: Survival rate by Age and Protocol.**

455 **Table S8: Survival by Age Group at 50% capacity.** Mean survival and 95% CI is reported for 1000  
456 Monte Carlo simulations at the indicated level of scarcity.

457 **Table S9: Survival by Protocol at different Capacities.** Mean survival and 95% CI is reported for 250  
458 Monte Carlo simulations at the indicated level of scarcity. All findings within and across capacity-levels  
459 are statistically significant to  $P < 0.05$ .

460 **Table S10: Lives Saved by Protocol at different Capacities.** Mean survival and 95% CI is reported for  
461 250 Monte Carlo simulations at the indicated level of scarcity. All findings within and across capacity-  
462 levels are statistically significant to  $P < 0.05$ .

463 **Table S11: Life-years Saved by Protocol at different Capacities.** Mean survival and 95% CI is  
464 reported for 250 Monte Carlo simulations at the indicated level of scarcity. All findings within and across  
465 capacity-levels are statistically significant to  $P < 0.05$ .

Lives Saved By Protocol

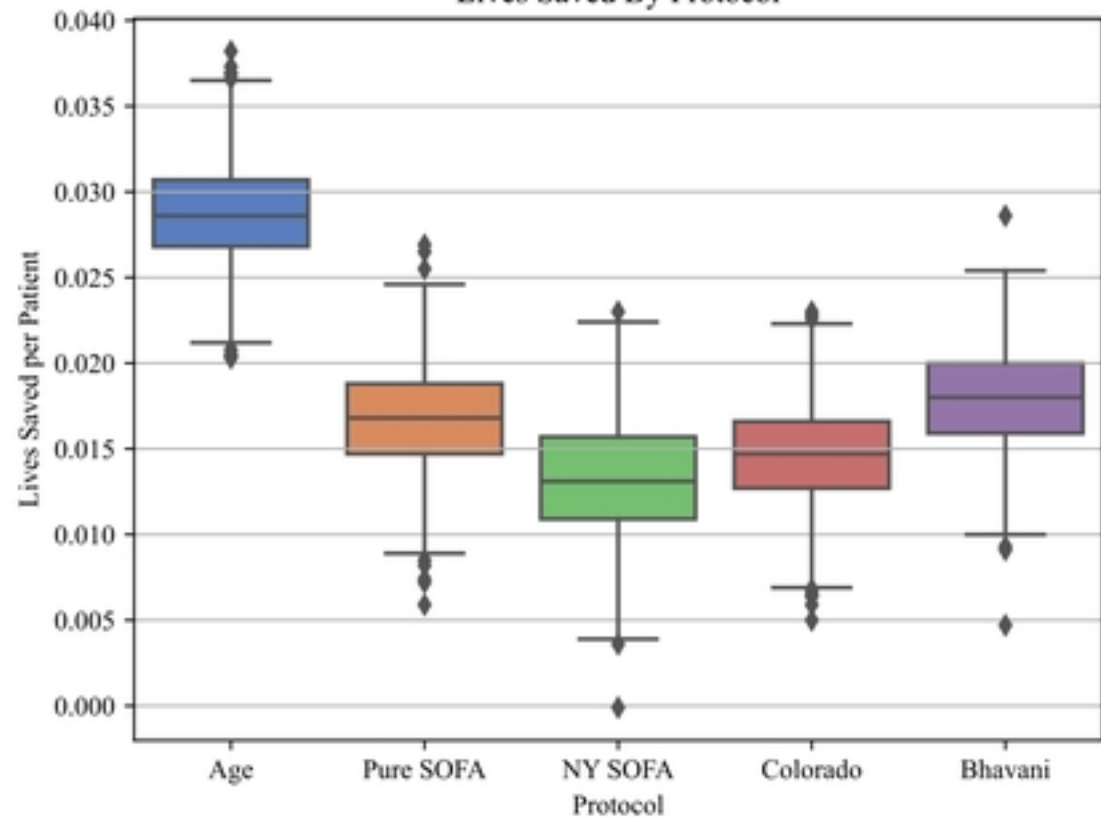

Lives Saved By Race and Protocol

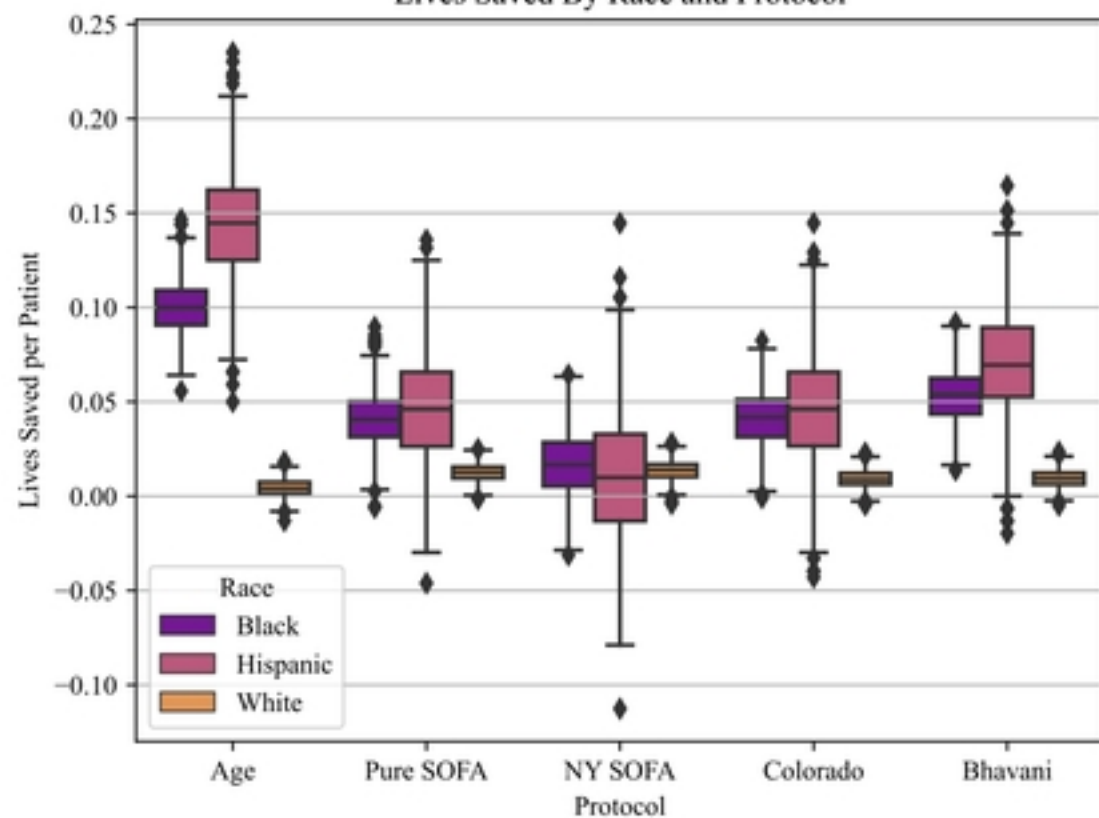

Fig 1

# Lives Saved at Different Levels of Scarcity

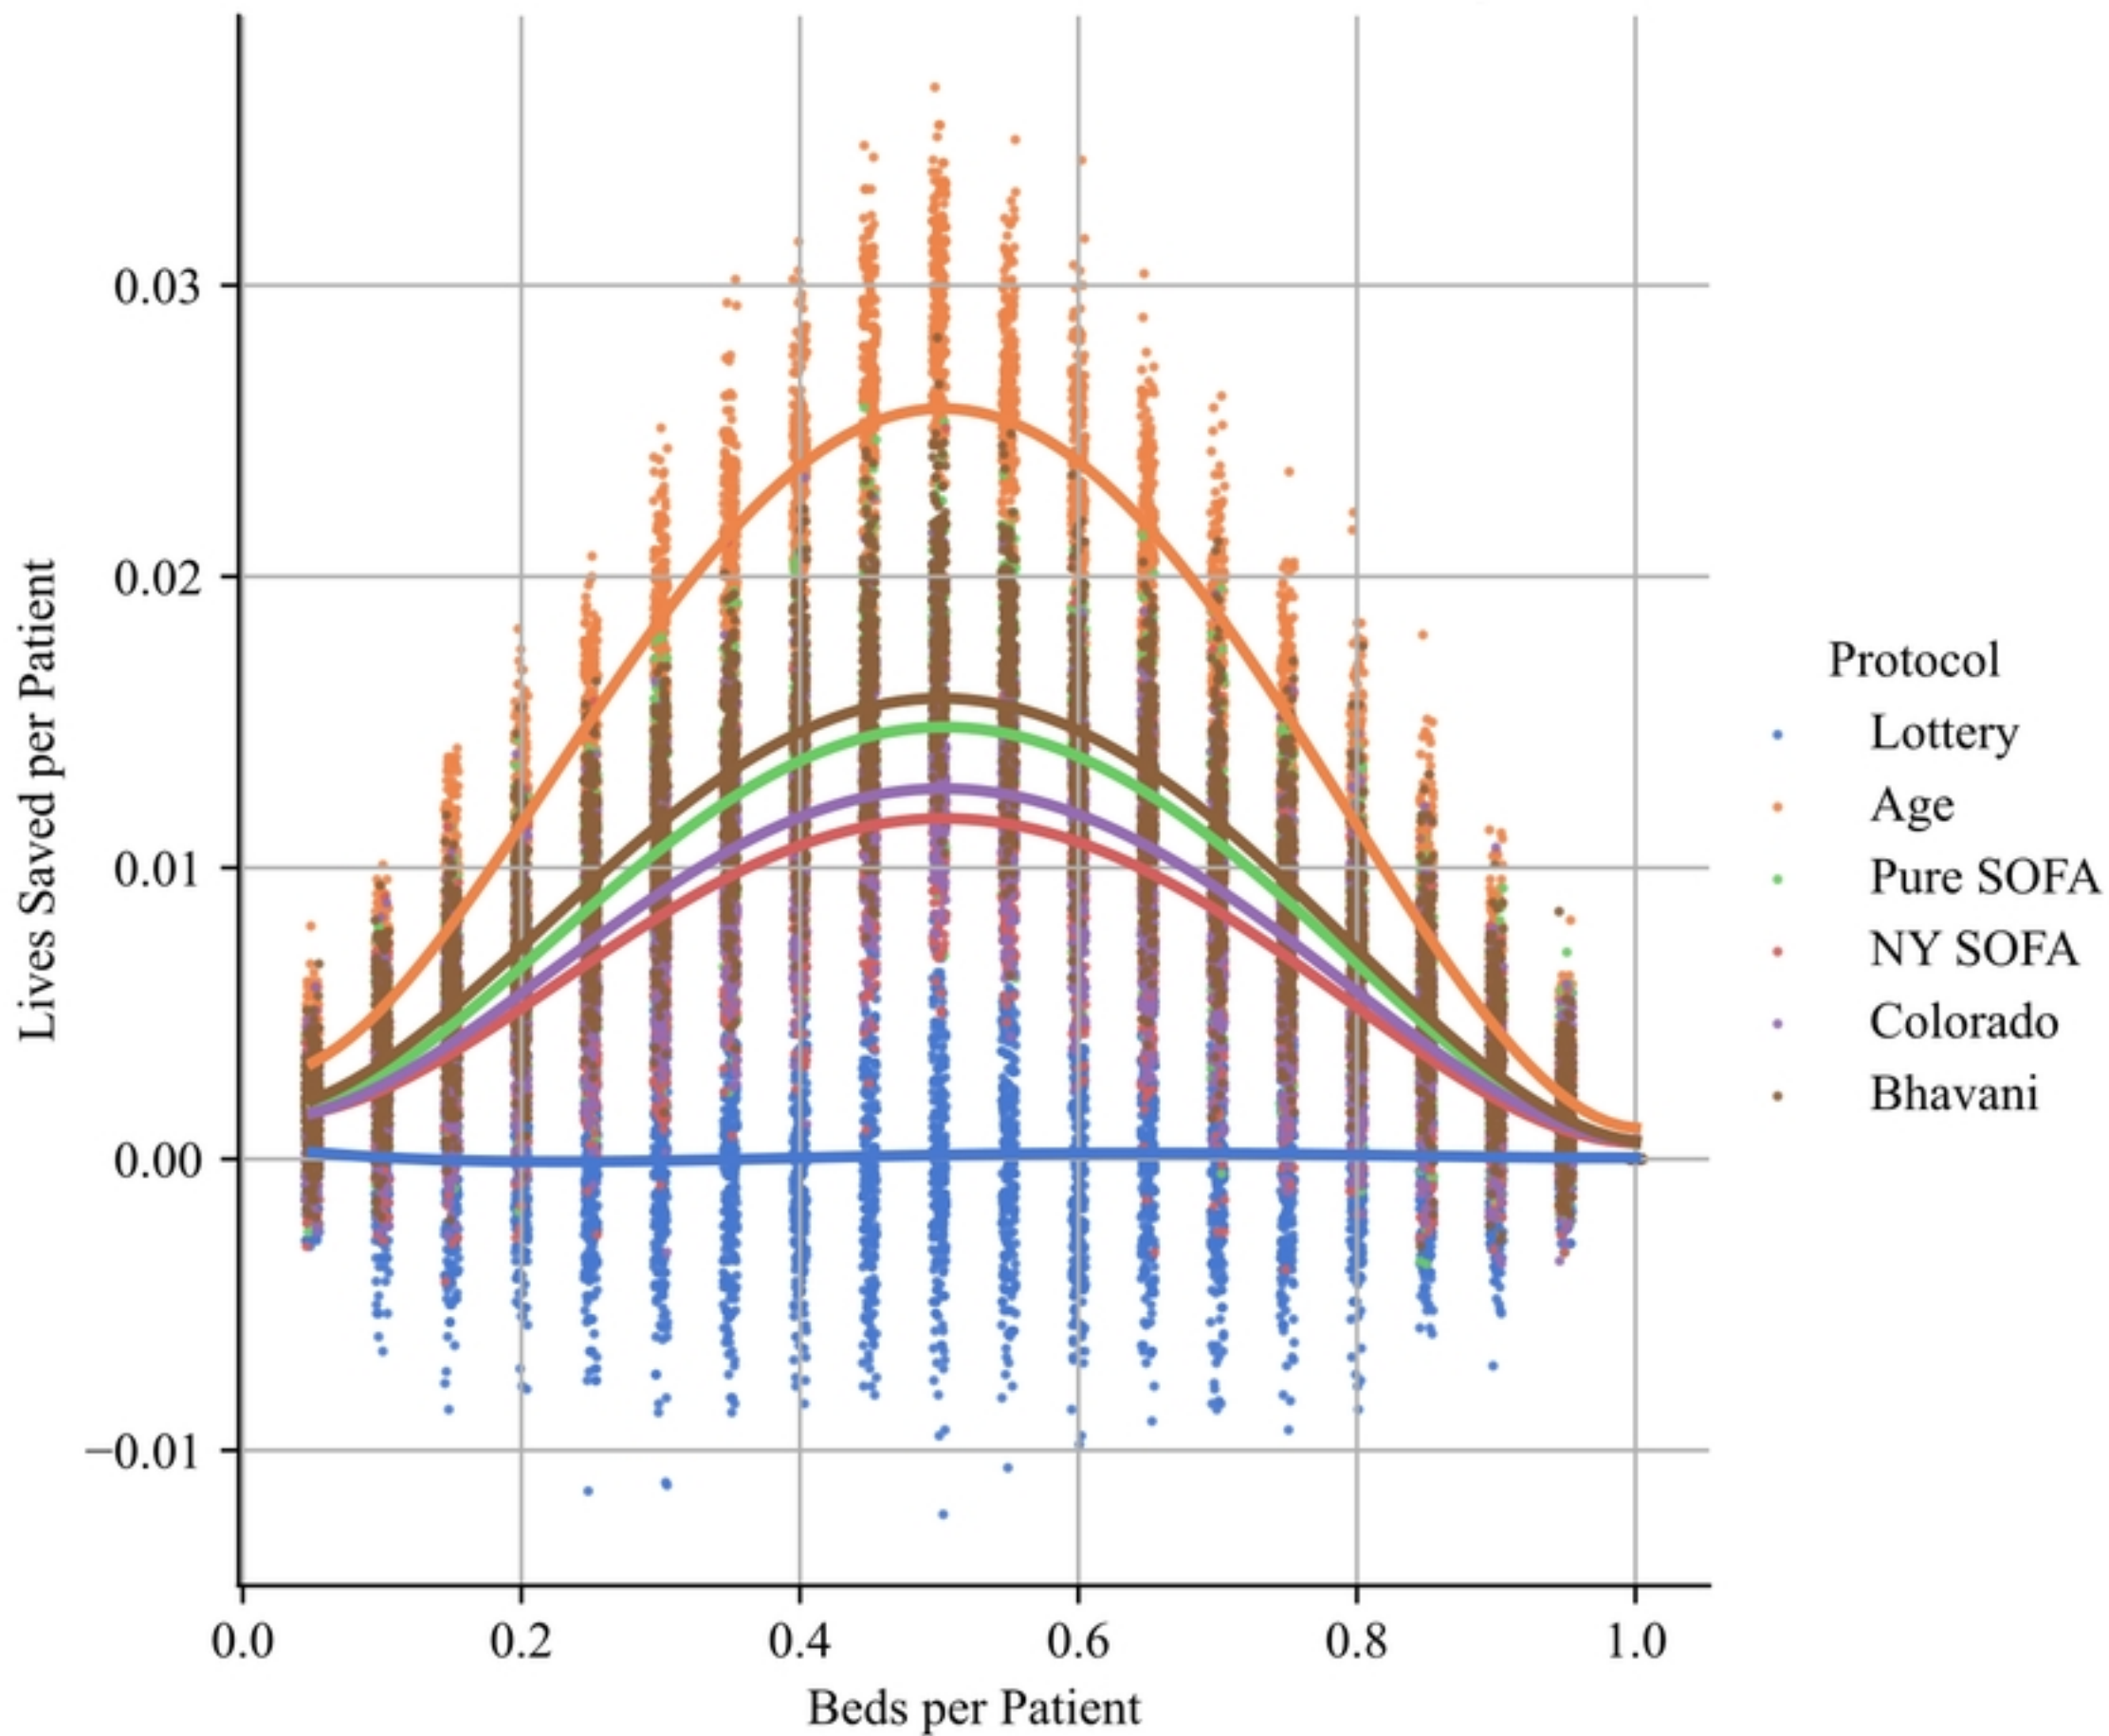

Fig 2

Years of Life Saved per Patient by Protocol (50% Scarcity)

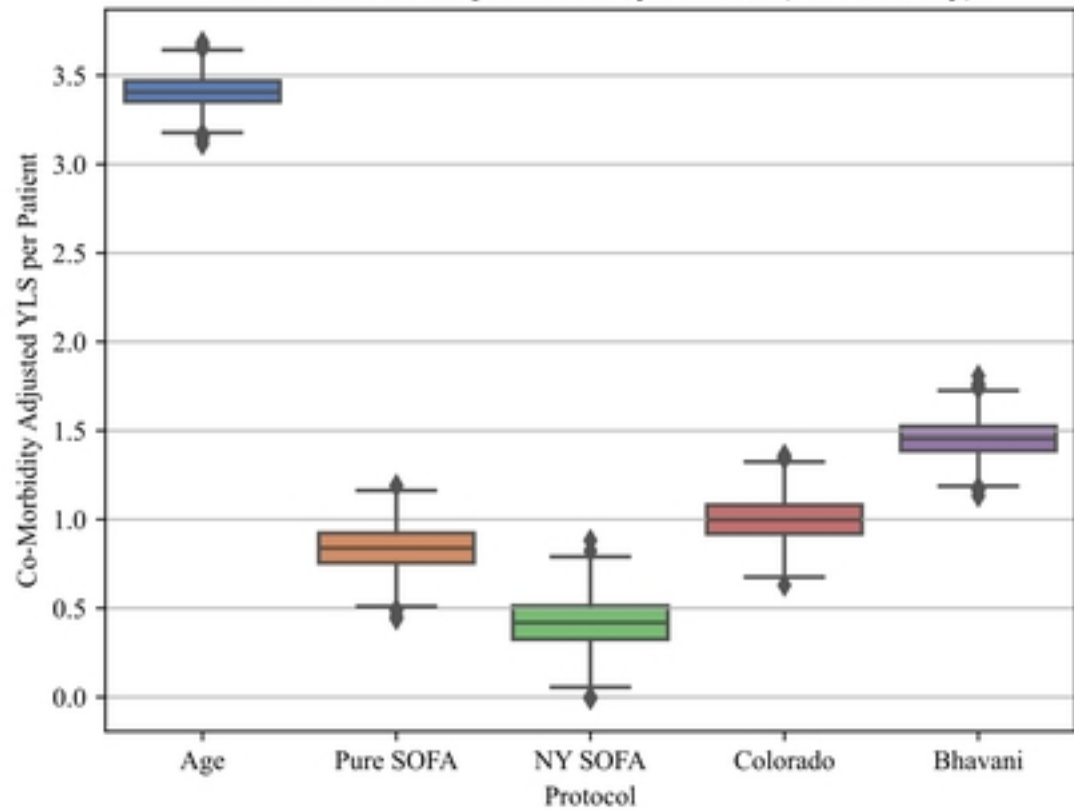

Years of Life Saved per Patient by Race and Protocol (50% Scarcity)

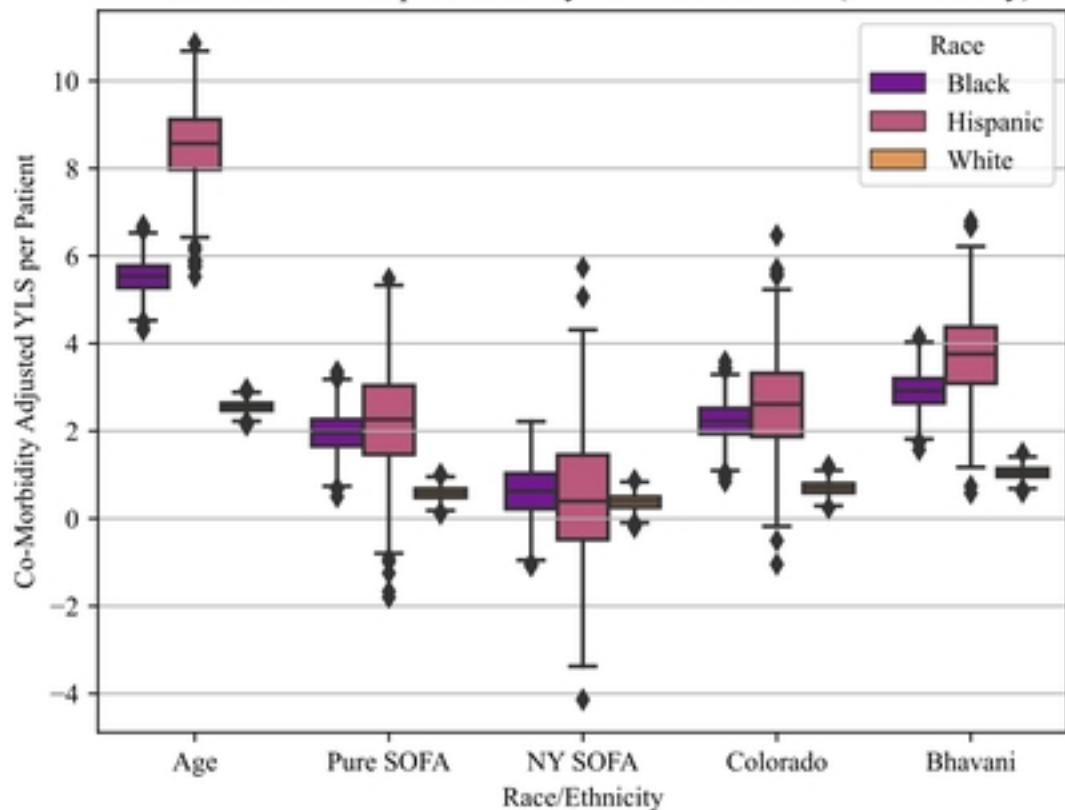

Fig 3

Lives Saved by Life Years Saved (50% Scarcity)

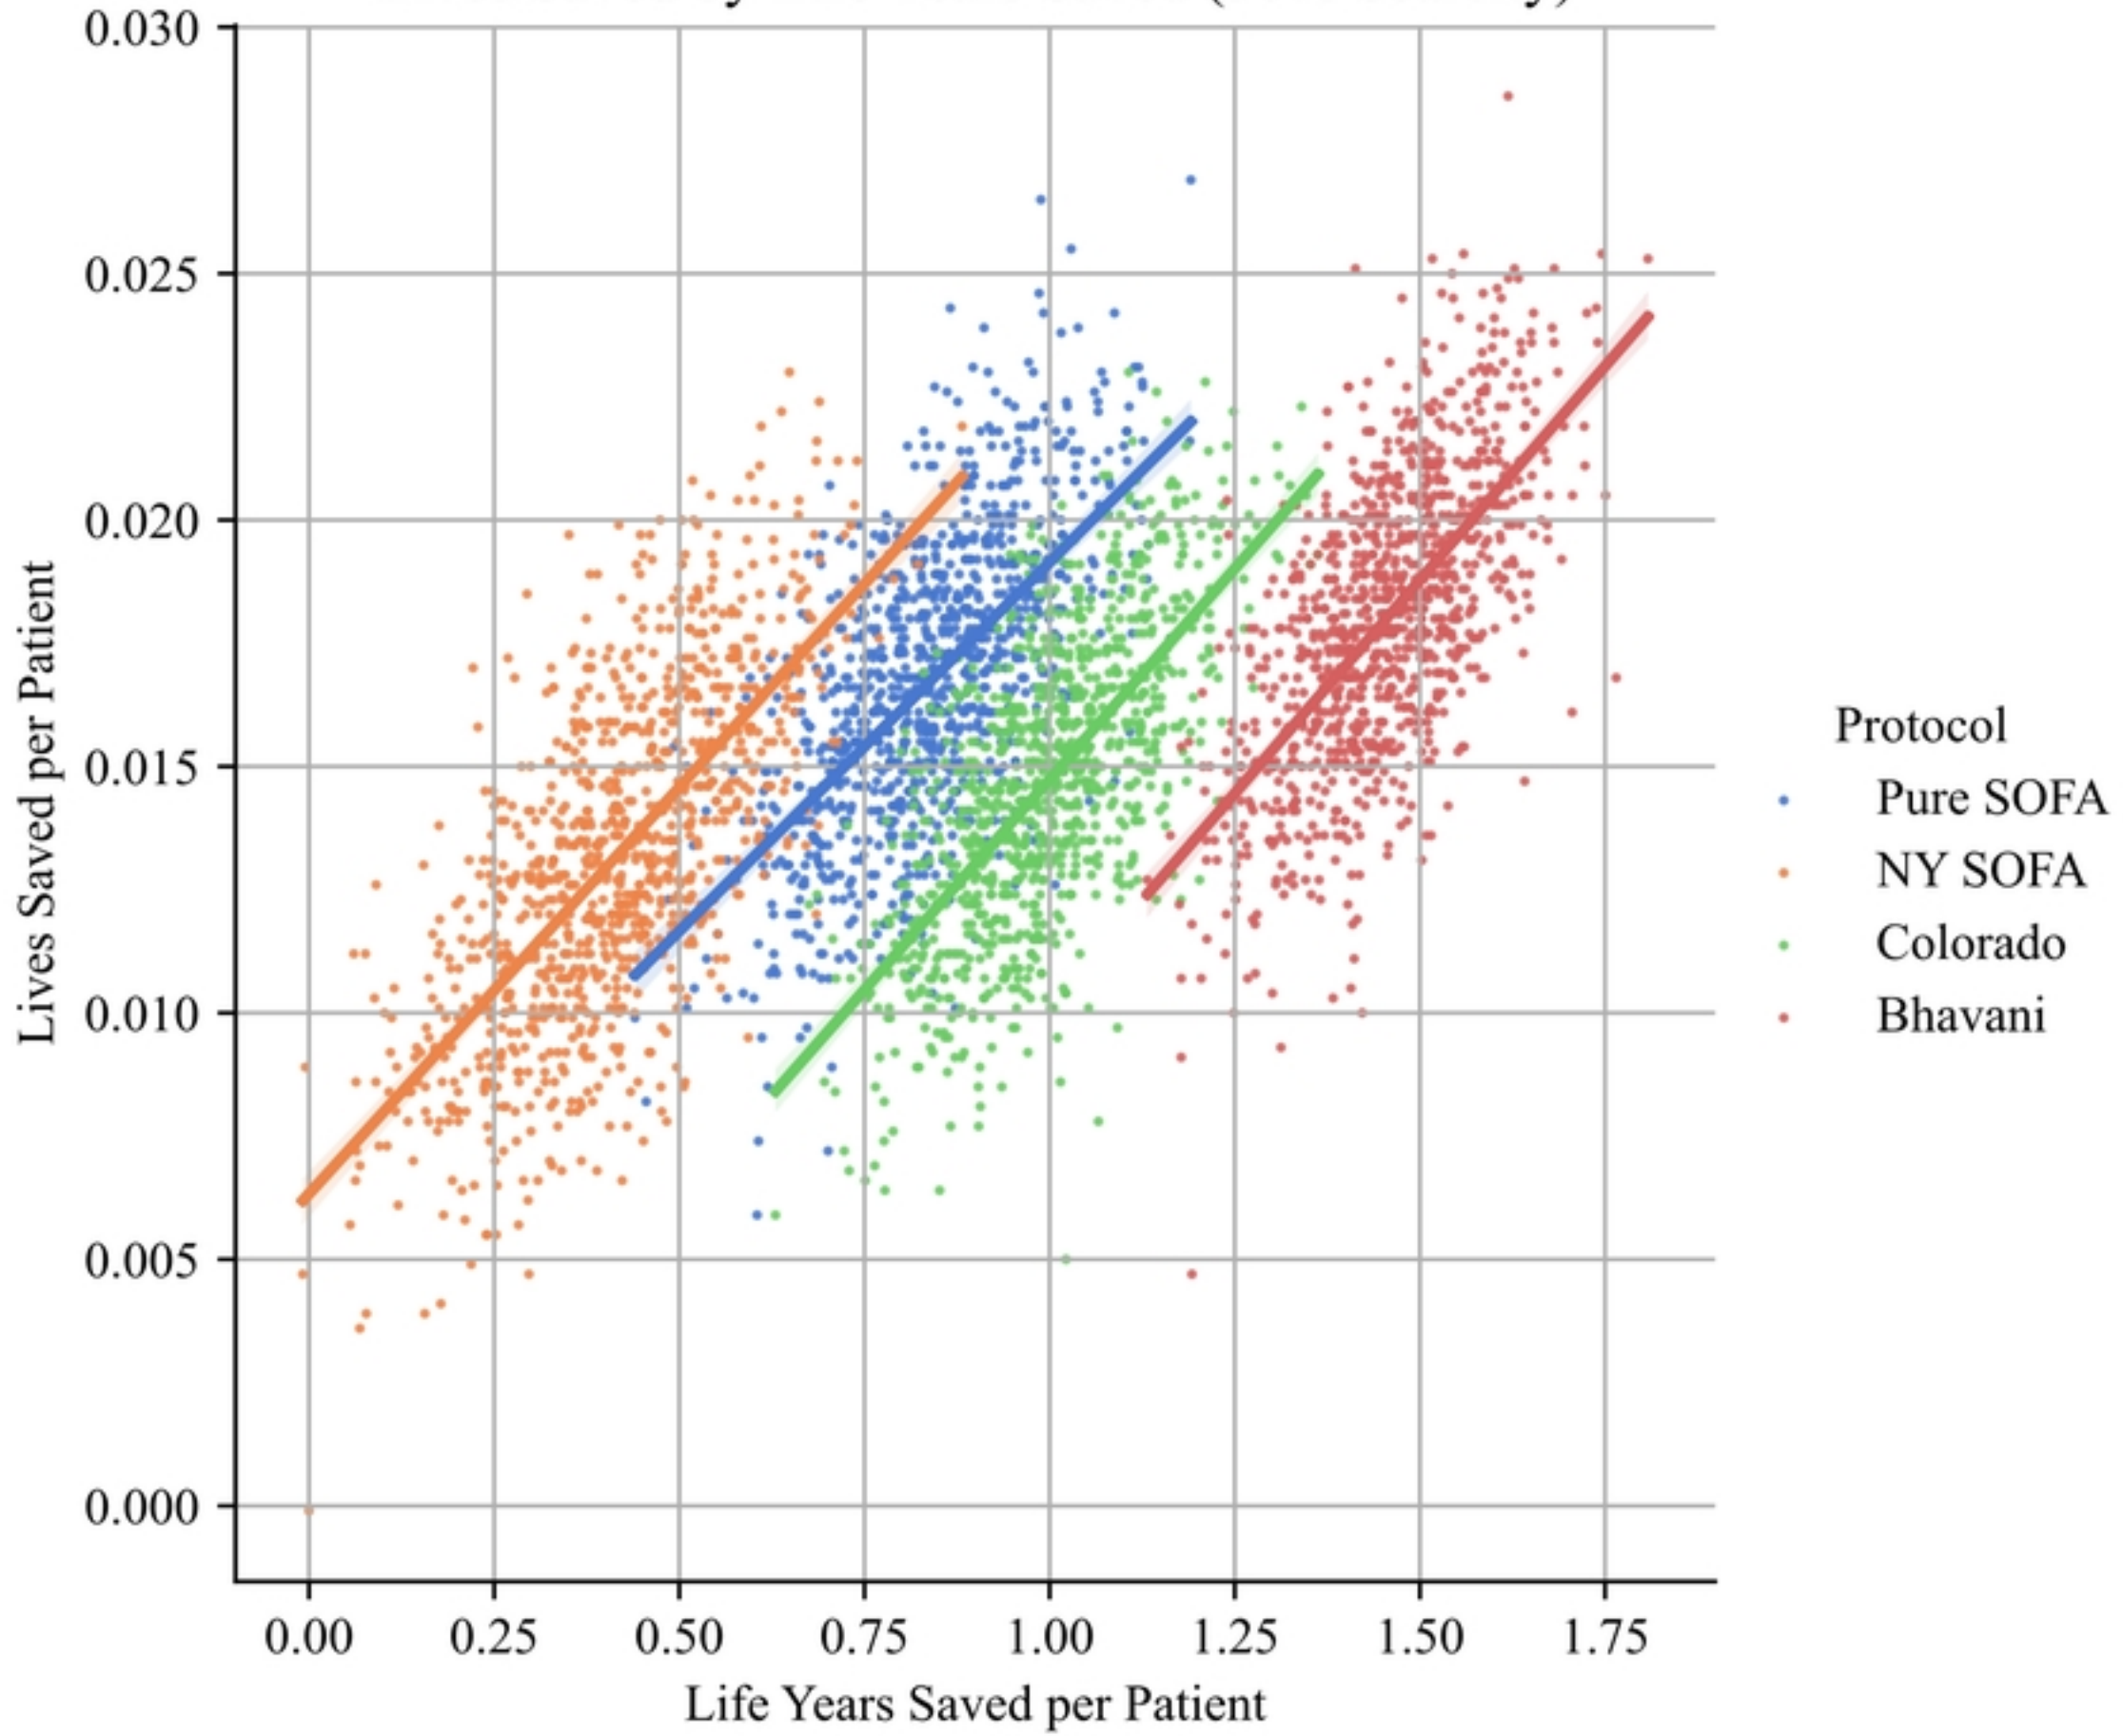

Fig 4
